# Supplementary material
Source: Springer Nature journal article supplement (http://www.springermedizin.de/resource/supplementary/12904_2011_116_MOESM2_ESM.pdf/9517542)
Supplement: MOESM2 [file 9517542]

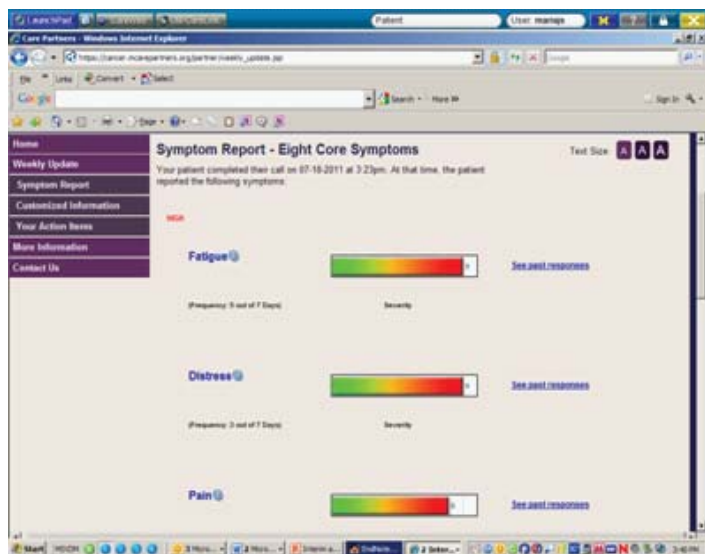

a) Depiction of patient's last symptom scores.

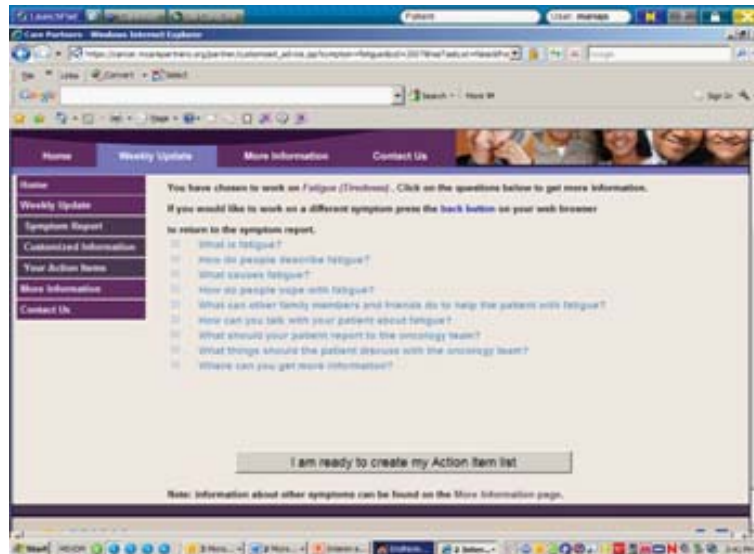

b) Information about fatigue.

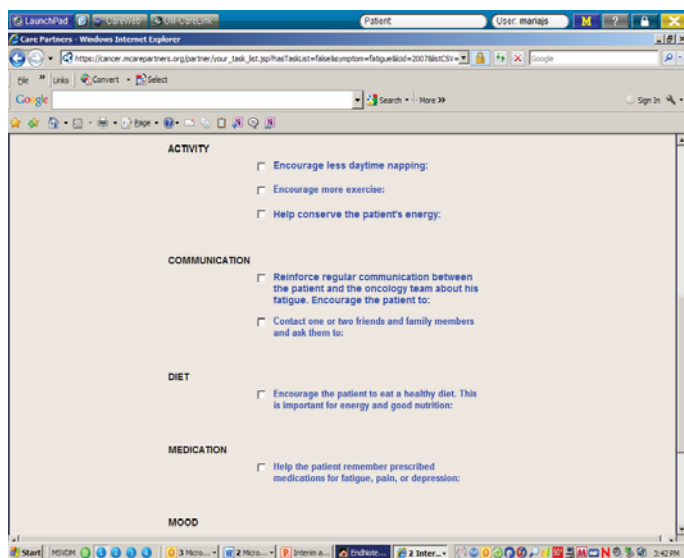

c) Advice for management of fatigue according to targeted domain.

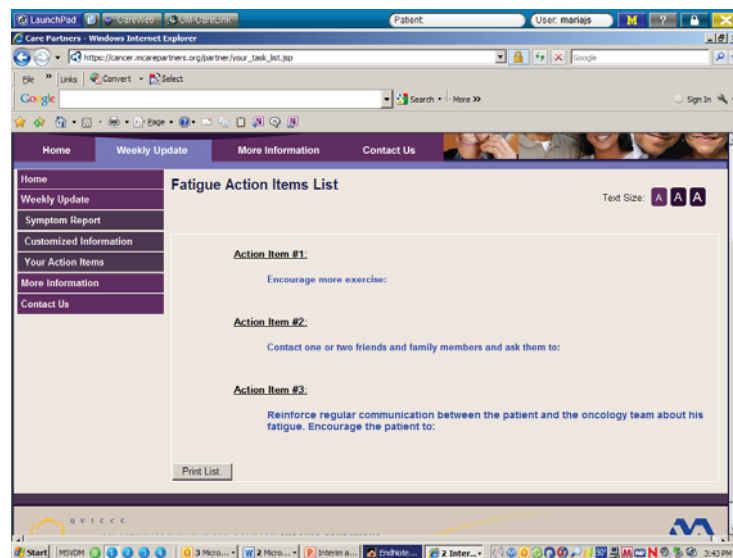

d) Chosen task list.
